# Supplementary material for: Antioxidant, Anti-Cancer Activity and Phytochemicals Profiling of Kigelia pinnata Fruits
Source: MDPI journal article supplement (doi:10.3390/separations9110379), 2022-11-18
Supplement: s1 [file s1]

Archive with 1 entries (1 files):
- separations-1951903-supplementary.pdf
